# Supplementary material for: Depletion induced vesicle-to-micelle transition from self-assembled rod–coil diblock copolymers with spherical magnetic nanoparticles
Source: Royal Society of Chemistry journal article supplement (doi:10.1039/c1sm05638g), 2011-01-01
Supplement: c1sm05638g.pdf [file c1sm05638g.pdf]

# Depletion Induced Vesicle-to-Micelle Transition from Self-Assembled Rod-Coil Diblock Copolymers with Spherical Magnetic Nanoparticles

Willy Agut,<sup>a,b</sup> Daniel Taton,<sup>a,b</sup> Annie Brûlet,<sup>c,d</sup>  
Olivier Sandre,<sup>\*a,b</sup> and Sébastien  
Lecommandoux<sup>\*a,b</sup>

<sup>a</sup> Université de Bordeaux/IPB, ENSCBP, 16 avenue Pey Berland, 33607

<sup>10</sup> Pessac Cedex, France. Fax: +33 5 4000 8487; Tel: +3 5 4000 2241;

E-mail: [lecommandoux@enscbp.fr](mailto:lecommandoux@enscbp.fr)

<sup>b</sup> CNRS, Laboratoire de Chimie des Polymères Organiques (UMR5629),

Pessac, France. Fax: +33 5 4000 8487; Tel: +3 5 4000 3695 ;

E-mail: [olivier.sandre@ipb.fr](mailto:olivier.sandre@ipb.fr)

<sup>15</sup> <sup>c</sup> CEA Saclay, LLB, 91191 Gif sur Yvette, France

<sup>d</sup> CNRS, Laboratoire Léon Brillouin (UMR12), Gif sur Yvette, France

Supporting Information

DOI: 10.1039/b000000x

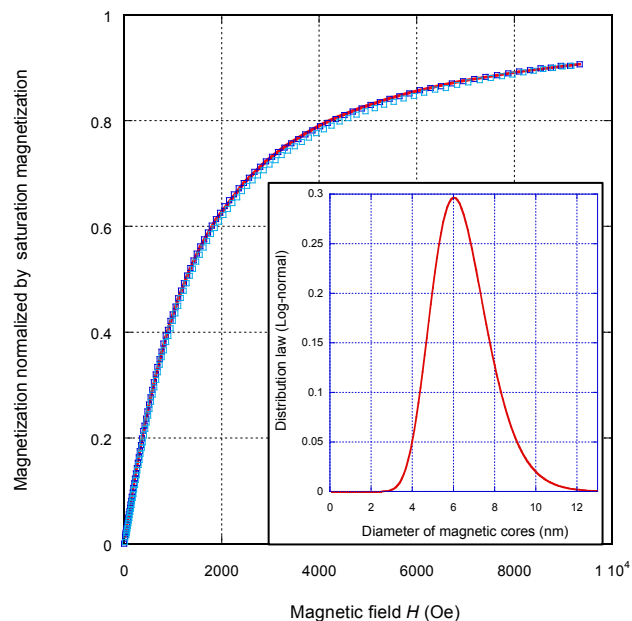

20 **Fig. S1** Magnetization curve vs. magnetic field for the USPIOs at 95 g/L (1.9 v/v %) in CH<sub>2</sub>Cl<sub>2</sub>. The curve was fitted with Langevin's law of superparamagnetism for a specific magnetization  $m_{\text{spe}}=2.8 \times 10^5$  A/m convolved with a Log-normal distribution law of the diameters of median value  $d_0=6.3$  nm and width  $\sigma=0.22$  plotted in the inset.

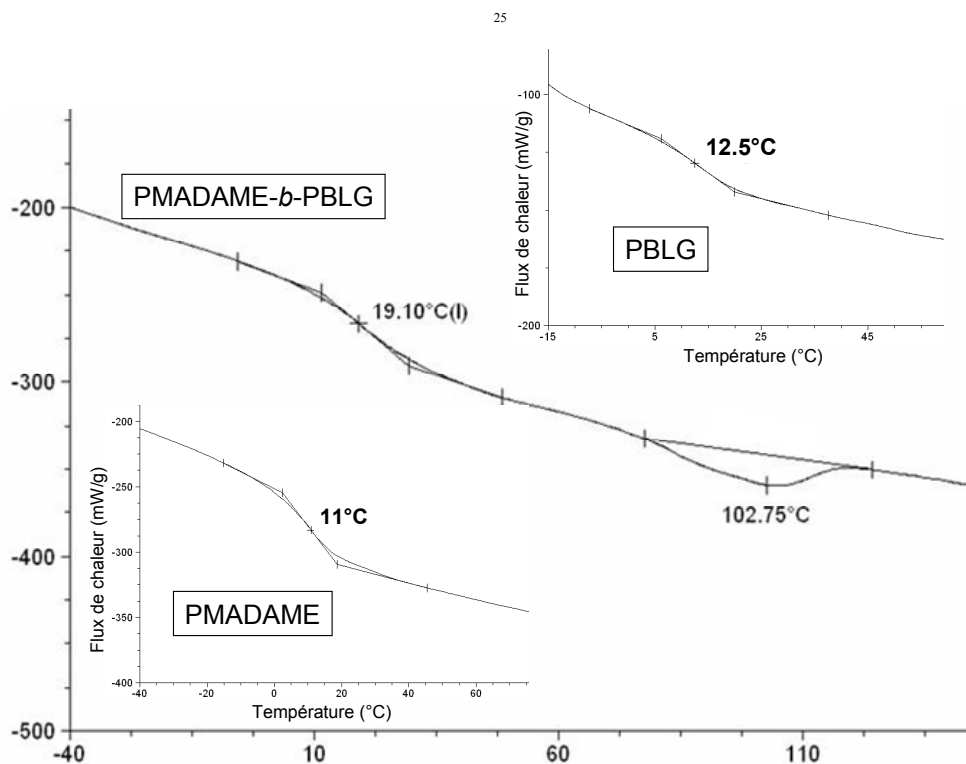

25 **Fig. S2** DSC curves representing heat flow (mW/g) vs. temperature (°C) for the copolymer and the homopolymers.
